# Supplementary material for: Perylenetetracarboxylic–metal assemblies and anisotropic charge transport in a CuIIassembly
Source: Royal Society of Chemistry journal article supplement (doi:10.1039/c6nr01120a), 2016-01-01

## Electronic Supporting Information (ESI)

### **Perylenetetracarboxylic-metal assemblies and anisotropic charge transport in the Cu<sup>II</sup> assembly**

Linyi Bai,<sup>a</sup> Youyi Xia,<sup>a</sup> Avijit Jana,<sup>a</sup> Chung Yen Ang,<sup>a</sup> Lingzhi Zhao,<sup>a</sup> Zhi Fan,<sup>\*,b</sup> and Yanli Zhao<sup>\*,a,c</sup>

<sup>[a]</sup> Division of Chemistry and Biological Chemistry, School of Physical and Mathematical Sciences, Nanyang Technological University, 21 Nanyang Link, Singapore 637371

<sup>[b]</sup> College of Chemical Engineering and Materials Science, Tianjin University of Science and Technology, Tianjin 300457, China

<sup>[c]</sup> School of Materials Science and Engineering, Nanyang Technological University, 50 Nanyang Avenue, Singapore 639798

\*To whom correspondence should be addressed

Email: zhifan@tust.edu.cn; zhaoyanli@ntu.edu.sg

## 1. Instruments

### 1.1 Thermogravimetric analysis (TGA) & Fourier transform infrared (FT-IR) experiments

TGA was performed on a TGA 500 thermogravimetric analyzer by heating the samples at 20 °C min<sup>-1</sup> to 1000 °C in a nitrogen atmosphere (60 mL/min). FTIR spectra (KBr, Aldrich) were measured with an SHIMADZU IR Prestige-21 spectrometer. Samples were packed firmly to obtain transparent films.

### 1.2 Powder XRD measurements and scanning electron microscopy (SEM)

Powder XRD studies were performed on a SHIMADZU XRD-6000 Labx diffractometer, using Cu-K $\alpha$  radiation (40 kV, 300 mA) with a scanning rate of 0.02° s<sup>-1</sup> (2 $\theta$ ) at room temperature. SEM images were collected on a field emission JSM-6700F (JEOL) operated at 10 kV.

### 1.3 ICP-MS

The contents of metal ions and sodium ions in the samples were estimated by using a Perkin-Elmer Optima 2100 DV Inductive Coupled Plasma Mass Spectroscopy (ICP-MS). Then, the concentrations of metal ions were recorded and summarized in Table S1.

### 1.4 UV-vis absorption, fluorescence & CD spectra

Absorption spectra were recorded on UV-3600 UV-vis-NIR spectrophotometer (Shimadzu), while emission spectra were recorded on RF-5301 PC spectrofluorophotometer (Shimadzu) with 1.0 cm path length cell. CD spectra were recorded on a Jasco J-810 CD spectrophotometer.

### 1.5 X-ray photoelectron spectroscopy (XPS) measurements

XPS measurements were performed with a PhiPro 100 spectrometer using Mg X-ray radiation source (SPECS, Germany) for wide range and high resolution scans at 12.53 kV. The XPS samples were coated on a conductive carbon tape that was then fixed on an aluminum XPS holder.

## 2. Sample preparation

Materials synthesis: solvents and all other chemicals were obtained from commercial sources and were used without further purifications. Firstly, PTCDA powder (0.39 g, 1 mM) was dispersed in a mixed solvent of THF and MeOH ( $V_{\text{THF}} : V_{\text{MeOH}} = 1:1$ , 100 mL). NaOH with 4 times of mole ratio of PTCDA was dissolved in an equal volume of water, which was added slowly into the stirring PTCDA solution in a dropwise fashion. The resulted solution was brought to reflux for 2 h in order to ensure a complete deprotonation to afford Na<sub>4</sub>PTC.

For the preparation of metal complexes, two typical methods were employed, where one involved the rapid mixing of individual components (*i.e.*, metal ions and Na<sub>4</sub>PTC), while the other was the slow diffusion of two separated components. In the rapid mixing synthesis process, a stock solution of Na<sub>4</sub>PTC ( $C = 10$  mM, 4 mL) was mixed rapidly with an equal volume of metal salt solution ( $C = 10$  mM) in THF/MeOH under vigorous stirring. After several hours, solid precipitates appeared in the resultant solution were obtained by centrifuging for 3 times in water at 5000 rpm for 5 min each. Other metal-PTC complexes were synthesized following a similar experimental procedure using different concentrations of metal ions. In the slow diffusion synthesis process, the solution of Na<sub>4</sub>PTC was prepared firstly, and then the solution of metal salt with a proper molar ratio (1:1 for Ag<sup>+</sup>, 2:1 for Zn<sup>2+</sup>, 2:1 for Cu<sup>2+</sup> and 4:1 for Zr<sup>4+</sup>) was dropped slowly to the Na<sub>4</sub>PTC solution to form the precipitates over 12 h without stirring.

For the samples used in XPS and ICP-MS tests, they were centrifuged 3 times in water at 5000 rpm for 5 min to ensure that the sodium salt was totally removed.

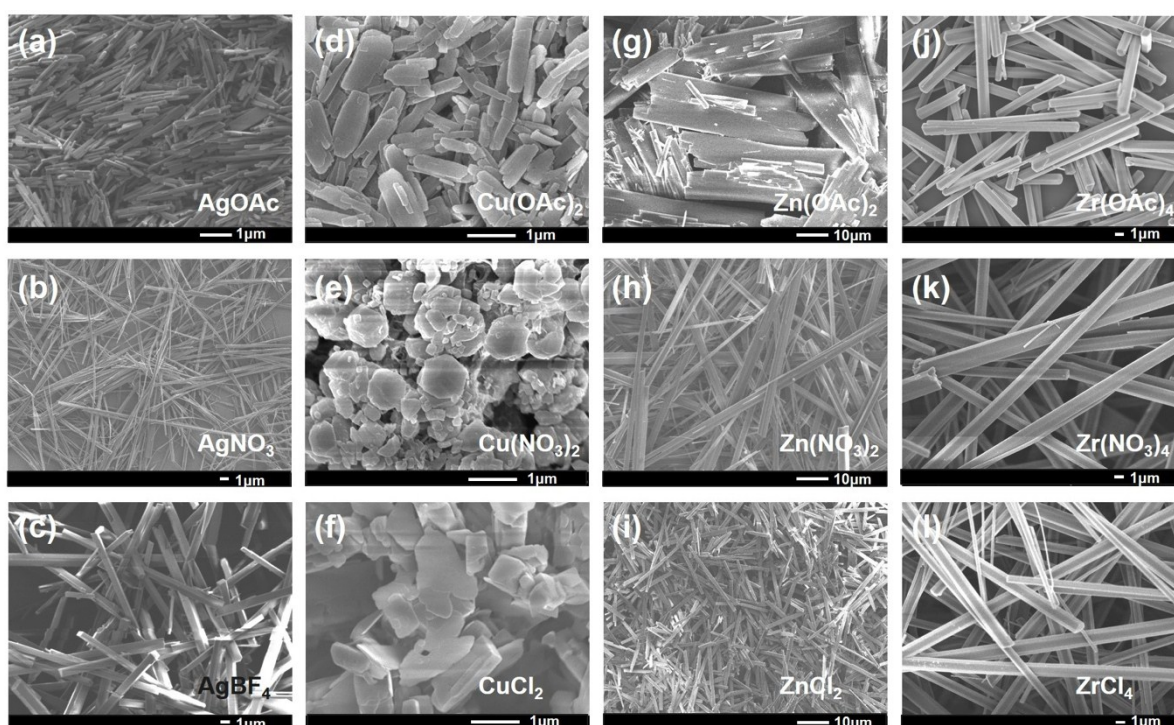

**Fig. S1.** Morphologies of complexes obtained by the rapid mixing method using  $\text{Na}_4\text{PTC}$  with various metal salts: (a-c)  $\text{Ag}^+$  salts, (d-f)  $\text{Cu}^{2+}$  salts, (g-i)  $\text{Zn}^{2+}$  salts, and (j-l)  $\text{Zr}^{4+}$  salts.

### 3. Physical properties of complexes

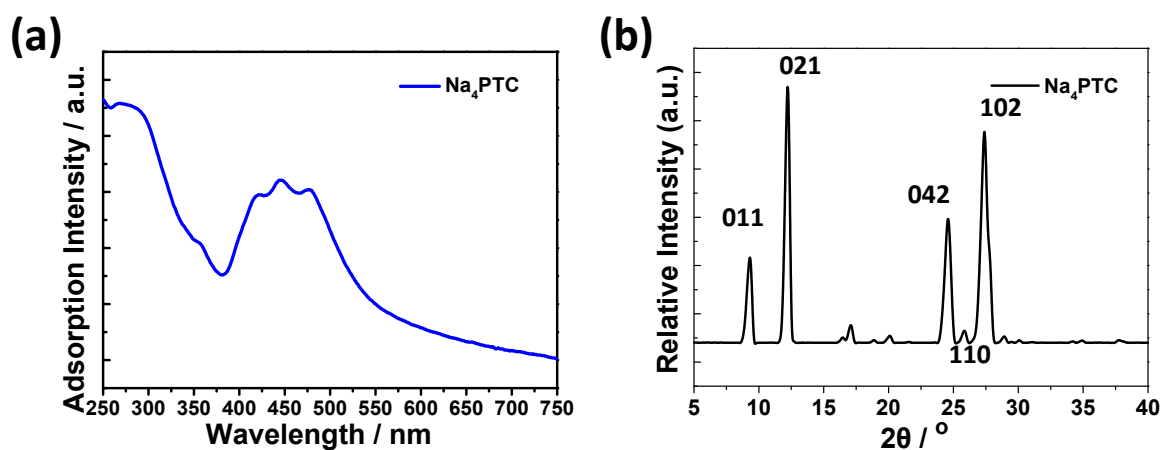

**Fig. S2.** (a) UV absorption spectra and (b) powder X-ray diffraction pattern of  $\text{Na}_4\text{PTC}$ .

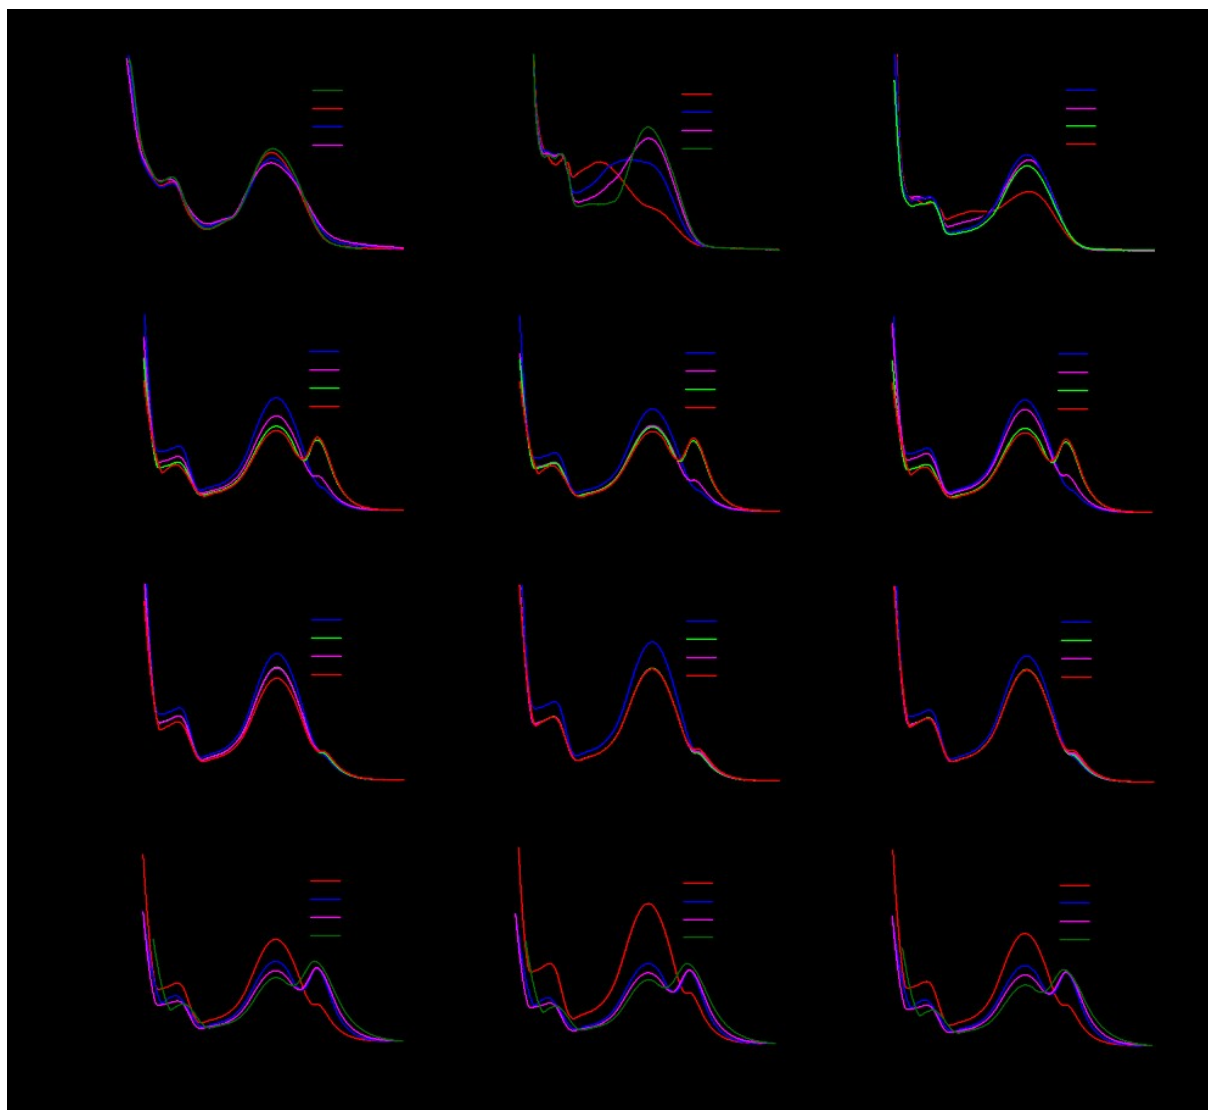

**Fig. S3.** UV absorption spectra of  $\text{Na}_4\text{PTC}$  with various metal salts having (a) acetate, (b) nitrate, and (c) chloride counter anions.

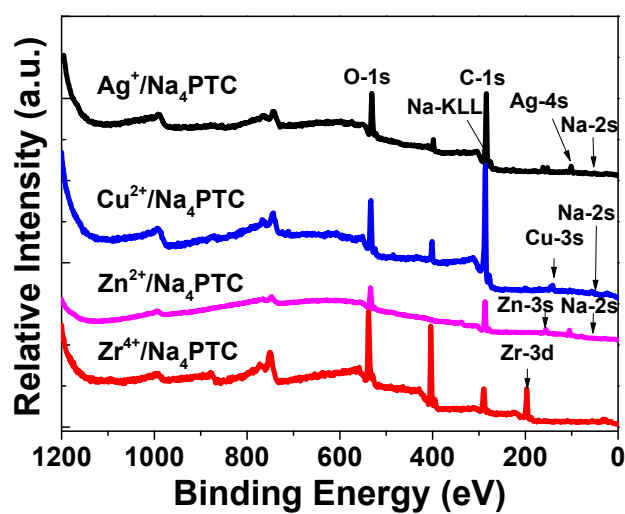

**Fig. S4.** XPS spectra of various complexes  $\text{M}^{n+}/\text{Na}_4\text{PTC}$ .

**Table S1.** Composition of metal ions / Na<sub>4</sub>PTC complex assemblies determined by ICP-MS.

| Sample                                | Theoretical ratio of metal ions to Na <sup>+</sup> concentration | Practical ratio of metal ions to Na <sup>+</sup> concentration |
|---------------------------------------|------------------------------------------------------------------|----------------------------------------------------------------|
| Ag <sup>+</sup> /Na <sub>4</sub> PTC  | 1:2                                                              | 0.52                                                           |
| Cu <sup>2+</sup> /Na <sub>4</sub> PTC | 1:4                                                              | 0.27                                                           |
| Zn <sup>2+</sup> /Na <sub>4</sub> PTC | 1:4                                                              | 0.28                                                           |
| Zr <sup>4+</sup> /Na <sub>4</sub> PTC | 1:8                                                              | No Na <sup>+</sup>                                             |

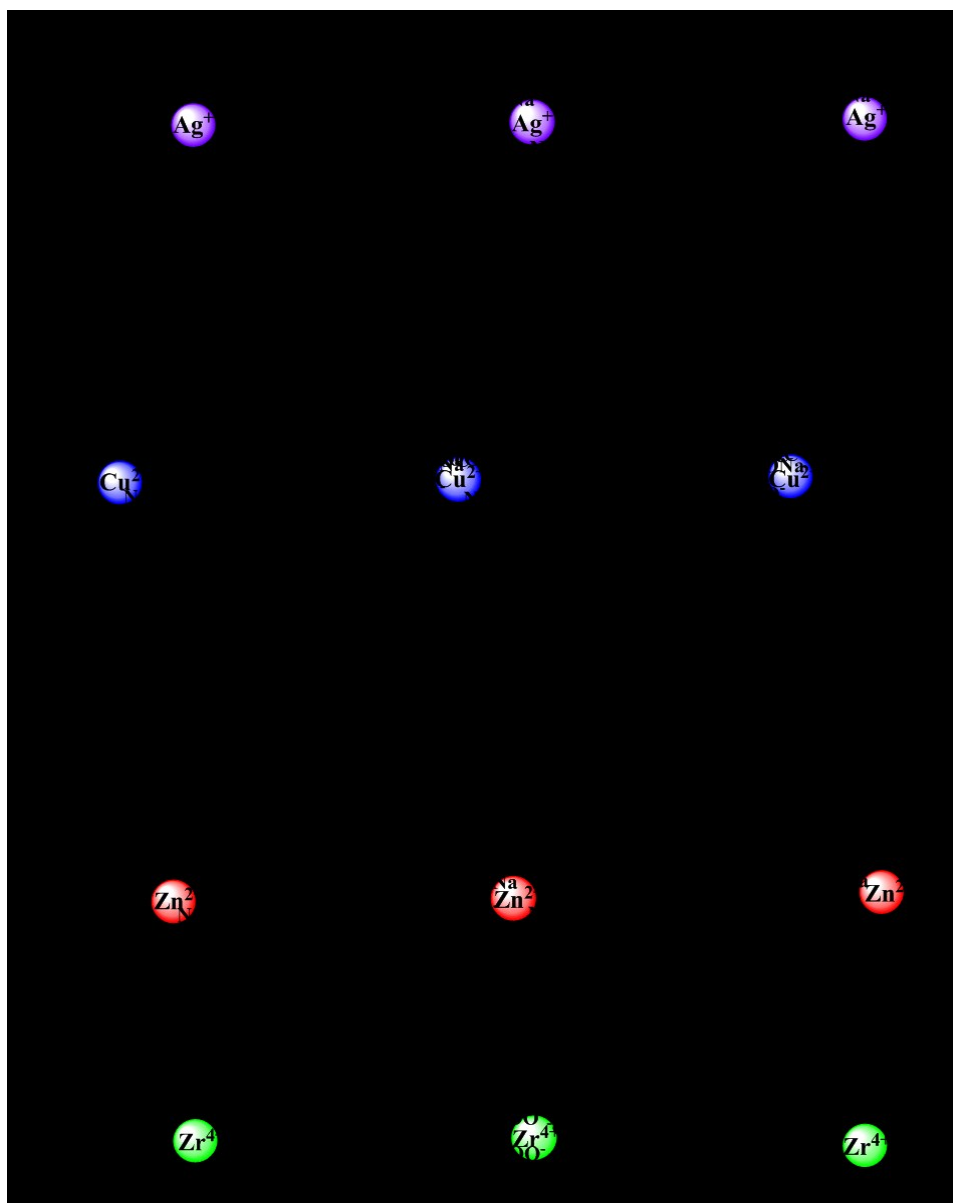

**Fig. S5.** Proposed mechanism for the formation of the complex assemblies: (a) Ag<sup>+</sup>/Na<sub>4</sub>PTC; (b) Cu<sup>2+</sup>/Na<sub>4</sub>PTC; (c) Zn<sup>2+</sup>/Na<sub>4</sub>PTC; (d) Zr<sup>4+</sup>/Na<sub>4</sub>PTC.

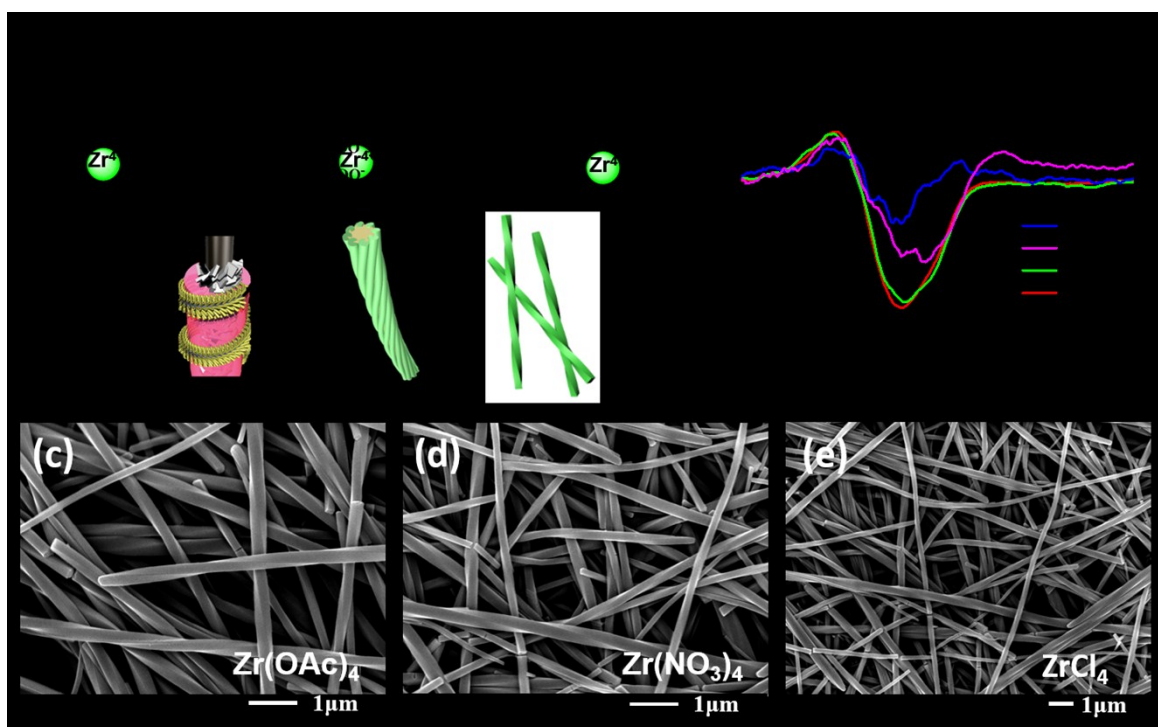

**Fig. S6.** (a) Schematic representation of the twisting nanorods; (b) CD spectra indicating the signals of chirality changes during the growth of twisting nanorods; (c-e) twisting nanorods with different pitches for various anion salts.

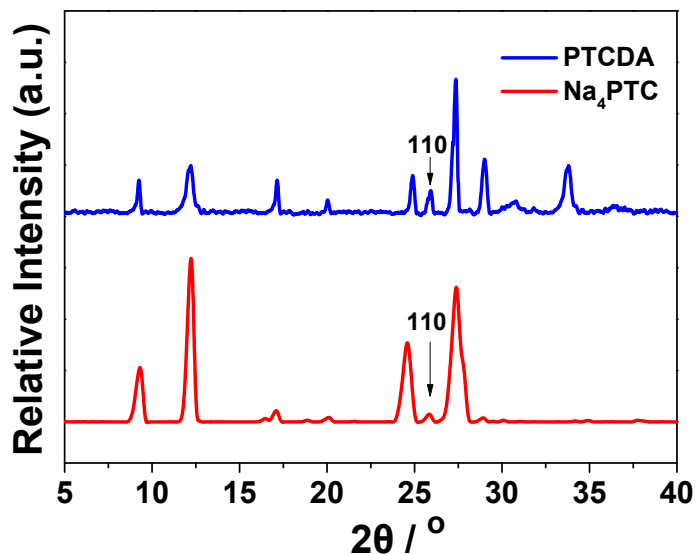

**Fig. S7.** Powder XRD patterns of PTCDA and Na<sub>4</sub>PTC.

To further study the composition of assemblies, powder XRD patterns of PTCDA and Na<sub>4</sub>PTC were performed for comparing with that of metal-ligand complex assemblies. In Fig. S7, an obvious difference was observed at 30-40°, which might be ascribed to the crystalline change by the neutralization of NaOH. In addition, the relative intensity also shows a bit difference. When comparing to the powder XRD patterns of the metal complex assemblies, the pattern of Na<sub>4</sub>PTC is similar to them, and the  $\pi$ - $\pi$  stacking could be easily found at  $2\theta = 25.10^\circ$ , labeled as (110).

It is well known that the electron transport is qualitatively consistent with molecular packing structures. The growth of metal-PTC complex assemblies is the competition outcome between  $\pi$ - $\pi$  stacking interaction and metal-ligand coordination. Thus, it was hypothesized the microstructures growing at different dimension offer an anisotropic electron transport, which could be verified through the OFET performance.

#### 4. Theoretical calculations for HOMO and LUMO orbital

**Table S2.** Theoretical HOMO and LUMO orbital of metal/ $\text{Na}_4\text{PTC}$  complexes.

|                                        | HOMO                                                                                | LUMO                                                                                 | Orbital No. |
|----------------------------------------|-------------------------------------------------------------------------------------|--------------------------------------------------------------------------------------|-------------|
| PTCDA                                  | 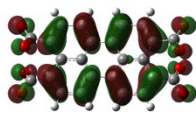   |    | 110-111     |
| $\text{Ag}^+/\text{Na}_4\text{PTC}$    |    |    | 119-120     |
| $\text{Cu}^{2+}/\text{Na}_4\text{PTC}$ |   |   | 119-120     |
| $\text{Zn}^{2+}/\text{Na}_4\text{PTC}$ |  |  | 115-116     |
| $\text{Zr}^{4+}/\text{Na}_4\text{PTC}$ |  |  | 115-116     |

#### 5. Field-effect transistor (FET) device fabrication

##### (1) Device fabrication:

Heavily *p*-doped Si substrates with thermally grown  $\text{SiO}_2$  (300 nm) layer were cleaned by two rounds of sonication in acetone and iso-propyl alcohol (20 minutes each round, and then dried under nitrogen flow). By using another photolithographic process, high-density patterned metallic electrodes (10 nm of Cr followed by 80 nm of Au) were introduced and separated by 7  $\mu\text{m}$  in the center. With the metal pads as source (S) and drain (D) contacts and the silicon substrate as a back gate (G), the devices can be electrically tested. Before dropping the active materials, an oxygen plasma cleaning treatment was performed on the substrate for 1 minute to improve the wetting of the surface.

##### (2) Deposition:

The metal/ $\text{Na}_4\text{PTC}$  hybrid materials were dispersed in a mixing solvent of THF/methanol (v:v =

3:7). In order to obtain dispersed solution, slight shaking or sonicating was performed. Then, the solution was dropped on the substrate prepared before. The resulted substrate was finally annealed at 100 °C for 30 minutes for solvent removal. The device characterization was carefully carried out at room temperature in the ambient atmosphere using an Agilent 4155C semiconductor characterization system (DC measurements) and a Karl Suss (PM5) manual probe station.

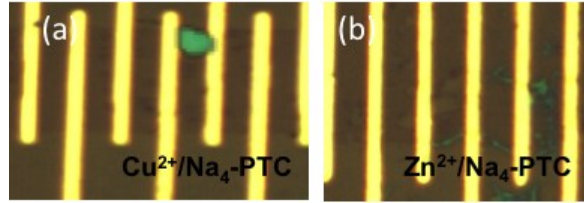

**Fig. S8.** Photos of crystal devices corresponding to the assemblies of (a)  $\text{Cu}^{2+}/\text{Na}_4\text{PTC}$  and (b)  $\text{Zn}^{2+}/\text{Na}_4\text{PTC}$ . Only  $\text{Cu}^{2+}/\text{Na}_4\text{PTC}$ -based device was qualified for anisotropic electron transport measurements on account of its suitable crystal size.

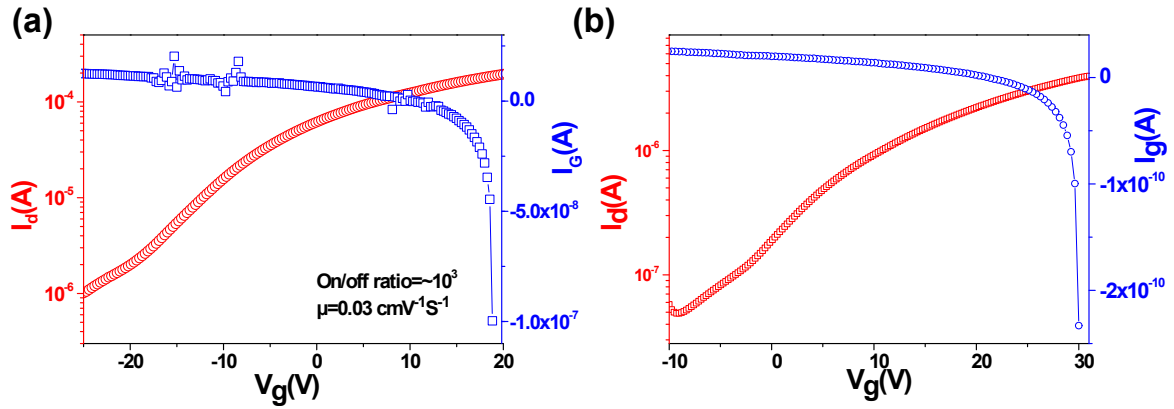

**Fig. S9.** (a) Transfer and (b) output characteristics of a  $\text{Cu}^{2+}/\text{Na}_4\text{PTC}$  single-plate transistor along  $a$  and  $b$  axes, respectively.

## 6. Reproducibility

Based on the performance of all the devices, we summarized the reproducibility under each condition. Firstly, the average value of charge mobility was calculated based on 3 devices under each condition. Then, the standard deviation of mobility could be obtained to show the distribution range of mobility under each condition.

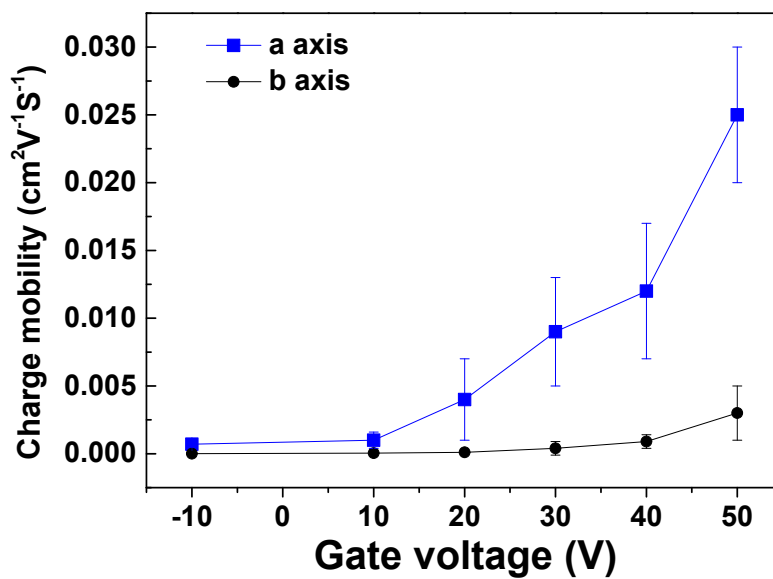

**Fig. S10.** Statistic standard deviation of charge mobility along *a* and *b* axes for the reproducibility of field-effect transistors.

## 7. Appendix

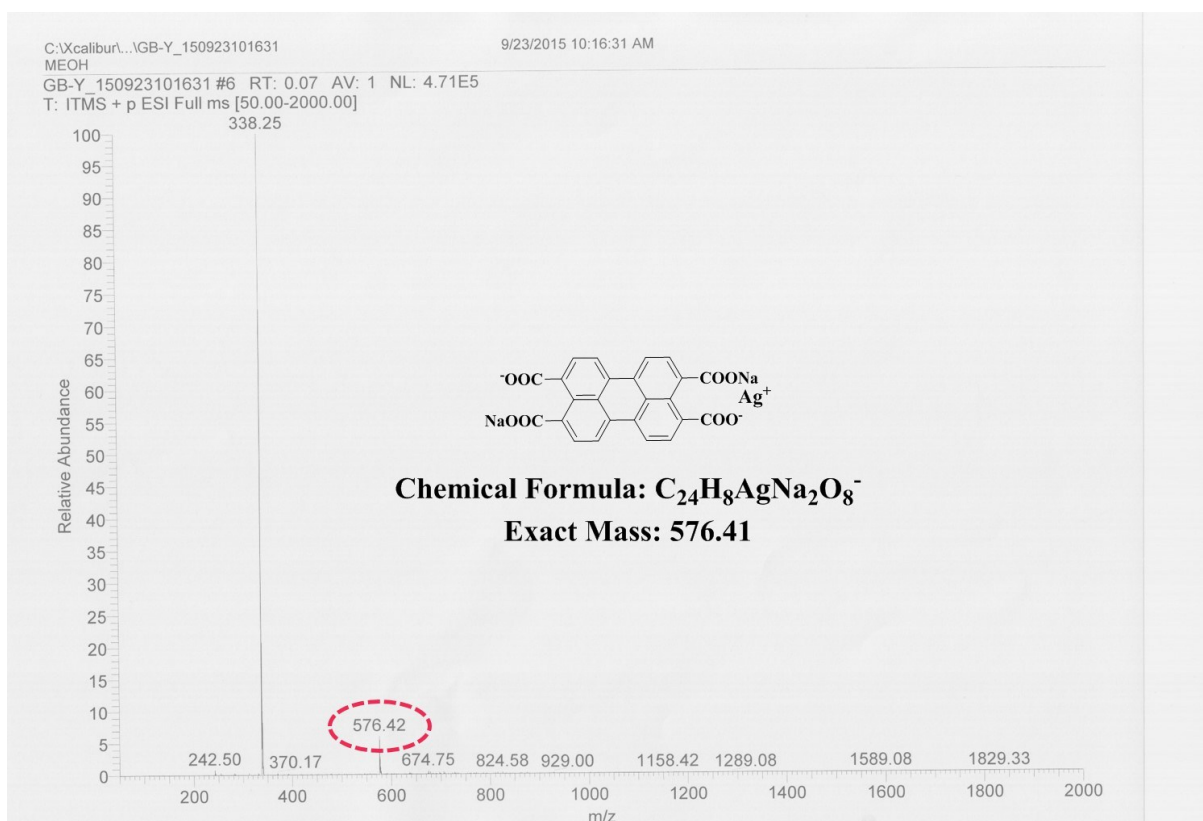

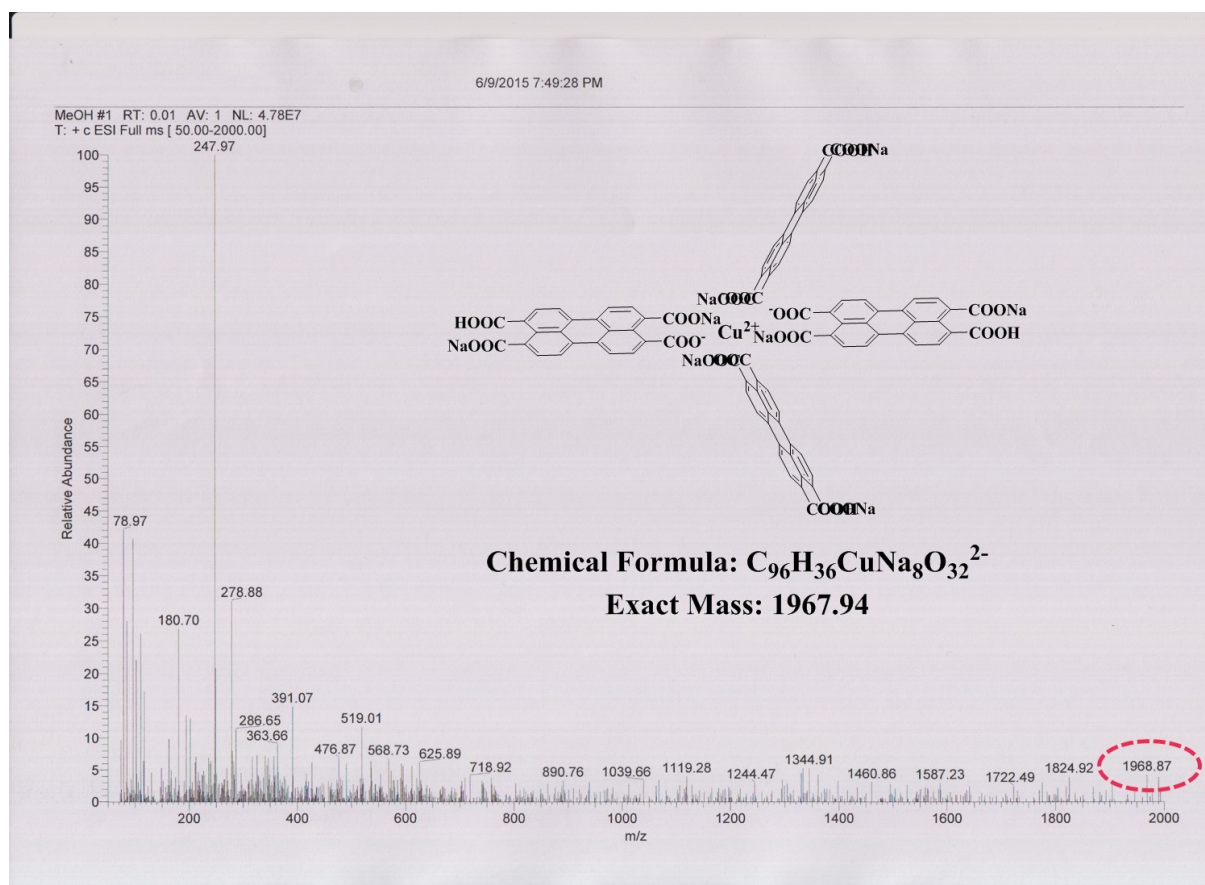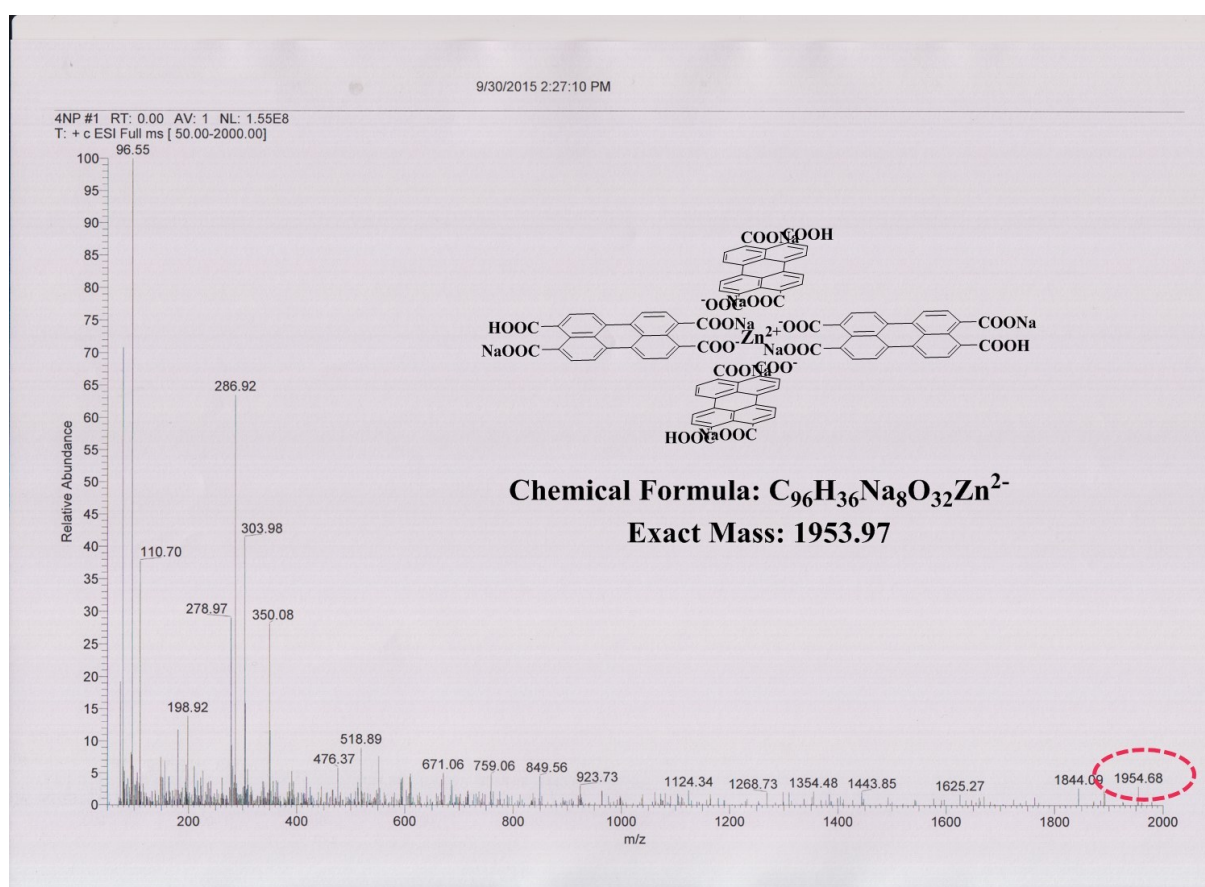

C:\Xcalibur\...WangYong\HY-pos  
meoh

6/9/2015 7:56:50 PM

HY-pos #1 RT: 0.01 AV: 1 NL: 1.07E8  
T: + c ESI Full ms [ 50.00-2000.00]

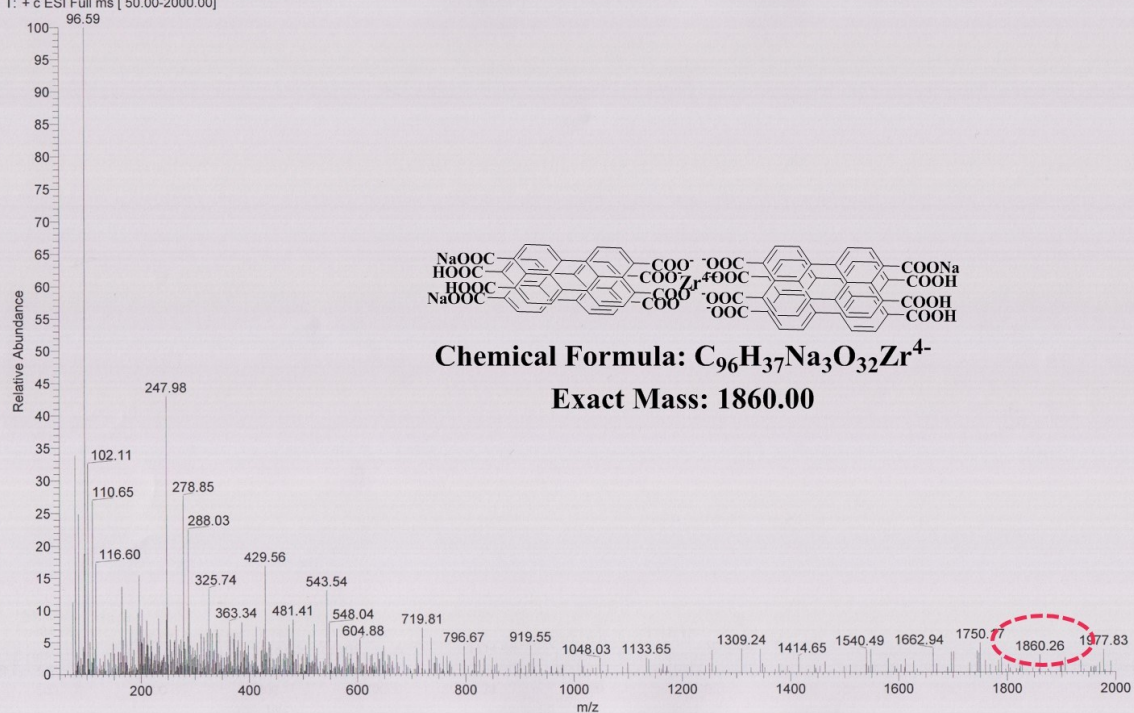

Supplement: c6nr01120a1.pdf [file c6nr01120a1.pdf]
